# Supplementary material
Source: PubMed Central journal article supplement (PMC9950331)

Figure S1. Cutoff value of s-JMJD6-Abs for detecting colorectal cancer was calculated to be 5,720 using the receiver operating characteristic curve. Sensitivity was measured at 37%, specificity at 86%, and AUC value at 0.584. AUC, area under the curve; s-JMJD6-Abs, serum antibodies against JMJD6.

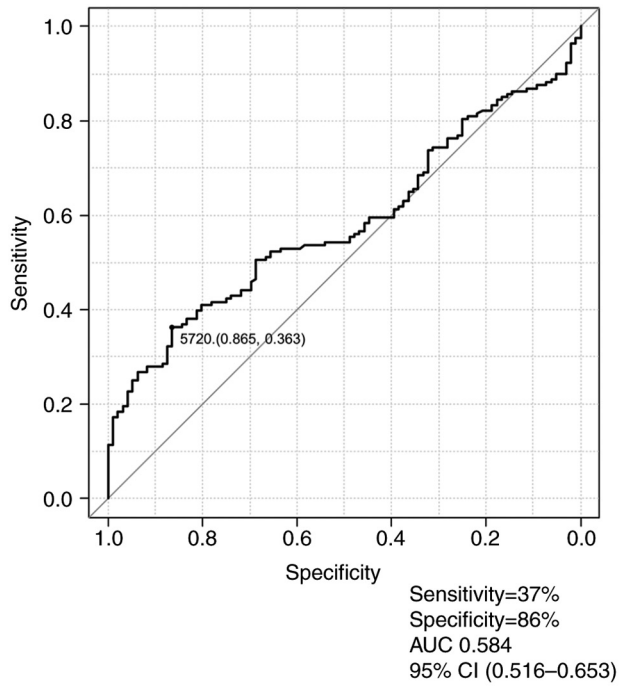

Supplement: Supplementary_Data.pdf [file Supplementary_Data.pdf]
